# Supplementary material for: Groundwater helium anomaly reflects strain change during the 2016 Kumamoto earthquake in Southwest Japan
Source: PubMed Central journal article supplement (PMC5126567; doi:10.1038/srep37939), 2016-11-29
Supplement: srep37939-s1.pdf [file srep37939-s1.pdf]

## **Supplementary Information**

---

### **Groundwater helium anomaly reflects strain change during the 2016 Kumamoto earthquake in Southwest Japan**

Yuji Sano<sup>1\*</sup>, Naoto Takahata<sup>1</sup>, Takanori Kagoshima<sup>1</sup>, Tomo Shibata<sup>2</sup>, Testuji Onoue<sup>3</sup>, Dapeng Zhao<sup>4</sup>

1. Atmosphere and Ocean Research Institute, The University of Tokyo, Kashiwa, Chiba 277-8564, Japan.
2. Institute for Geothermal Sciences, Kyoto University, Beppu, Oita 874-0903, Japan.
3. Department of Earth and Environmental Sciences, Kumamoto University, Kurokami, Kumamoto 860-8555, Japan.
4. Department of Geophysics, Tohoku University, Sendai, Miyagi 980-8578, Japan.

\*Correspondence and requests for materials should be addressed to Y.S. (e-mail: [ysano@ori.u-tokyo.ac.jp](mailto:ysano@ori.u-tokyo.ac.jp))

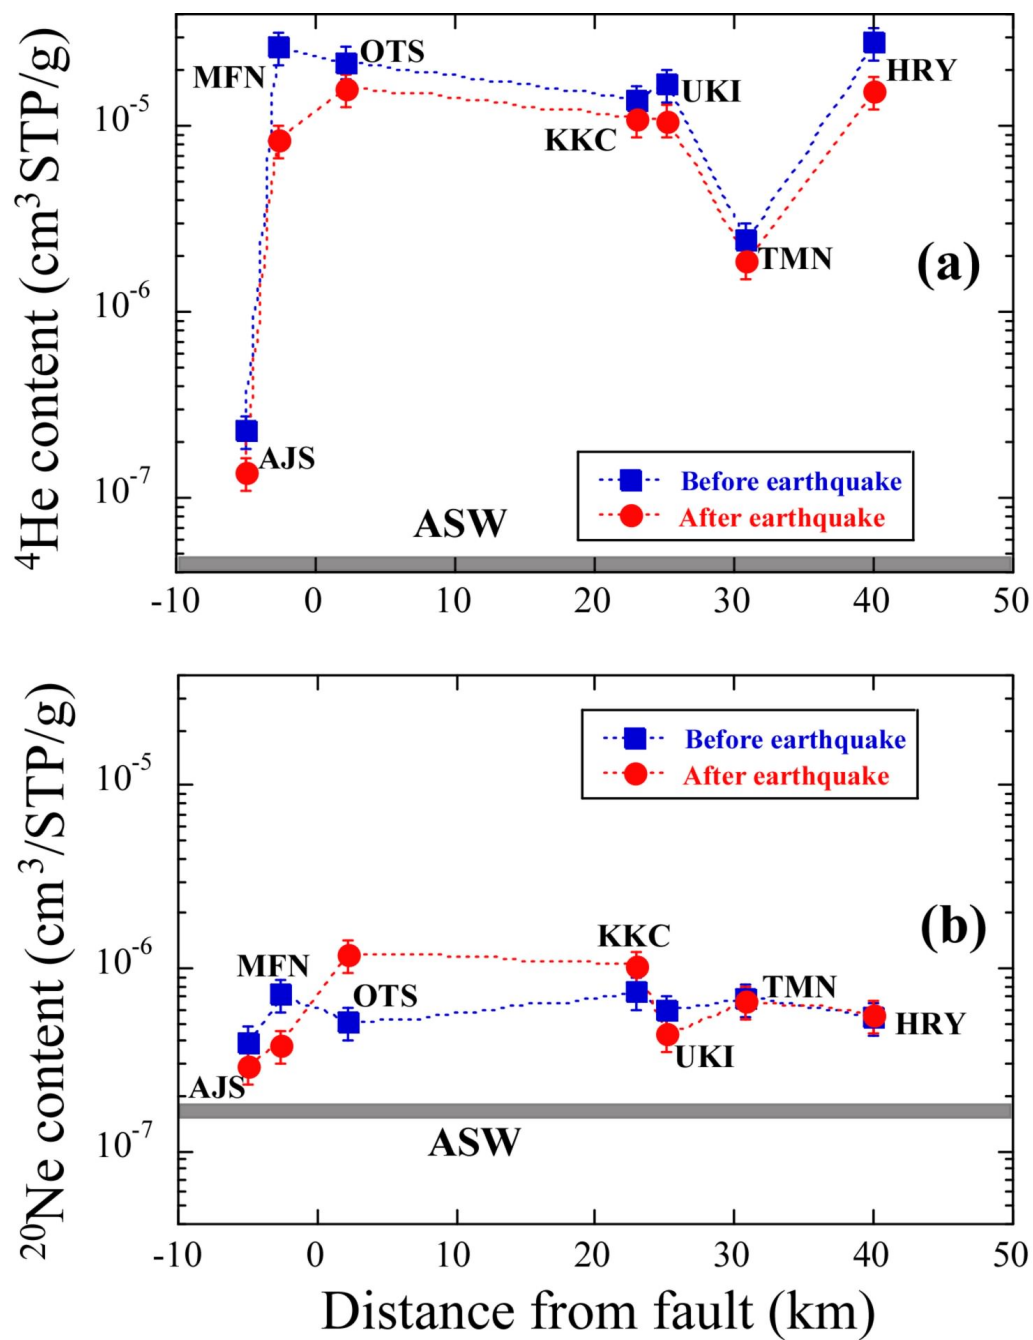

Supplementary Figure 1. (a) Relationship between the distance from the fault to the sampling site and helium content, and (b) that between the distance and neon content. ASW denotes the value of air saturated water.

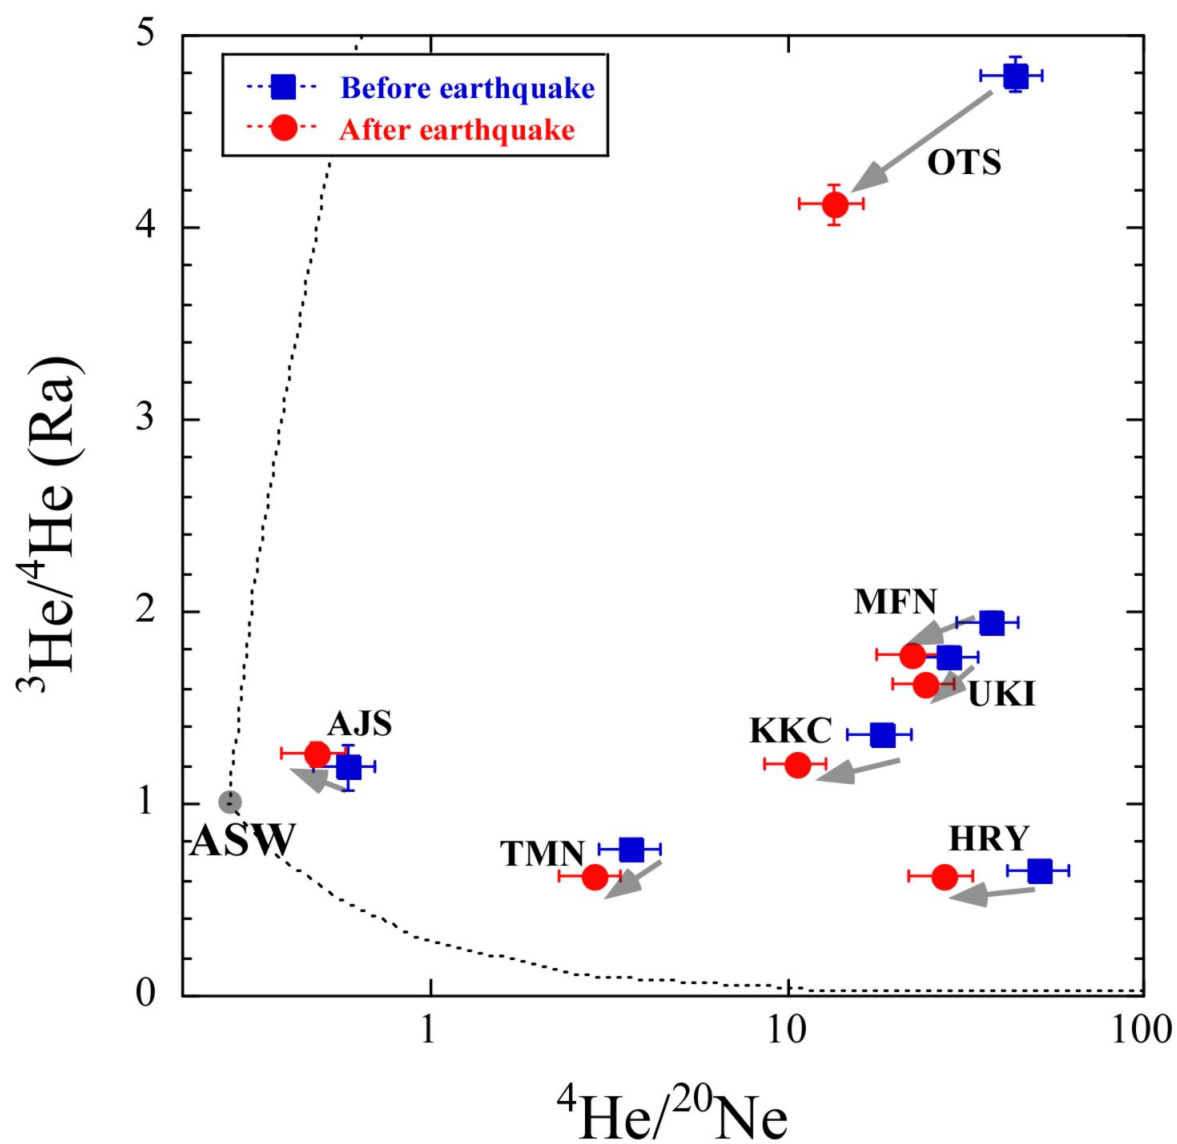

Supplementary Figure 2. Relationship between the  $^4\text{He}/^{20}\text{Ne}$  and  $^3\text{He}/^4\text{He}$  ratios of deep groundwater before and after the 2016 Kumamoto earthquake.

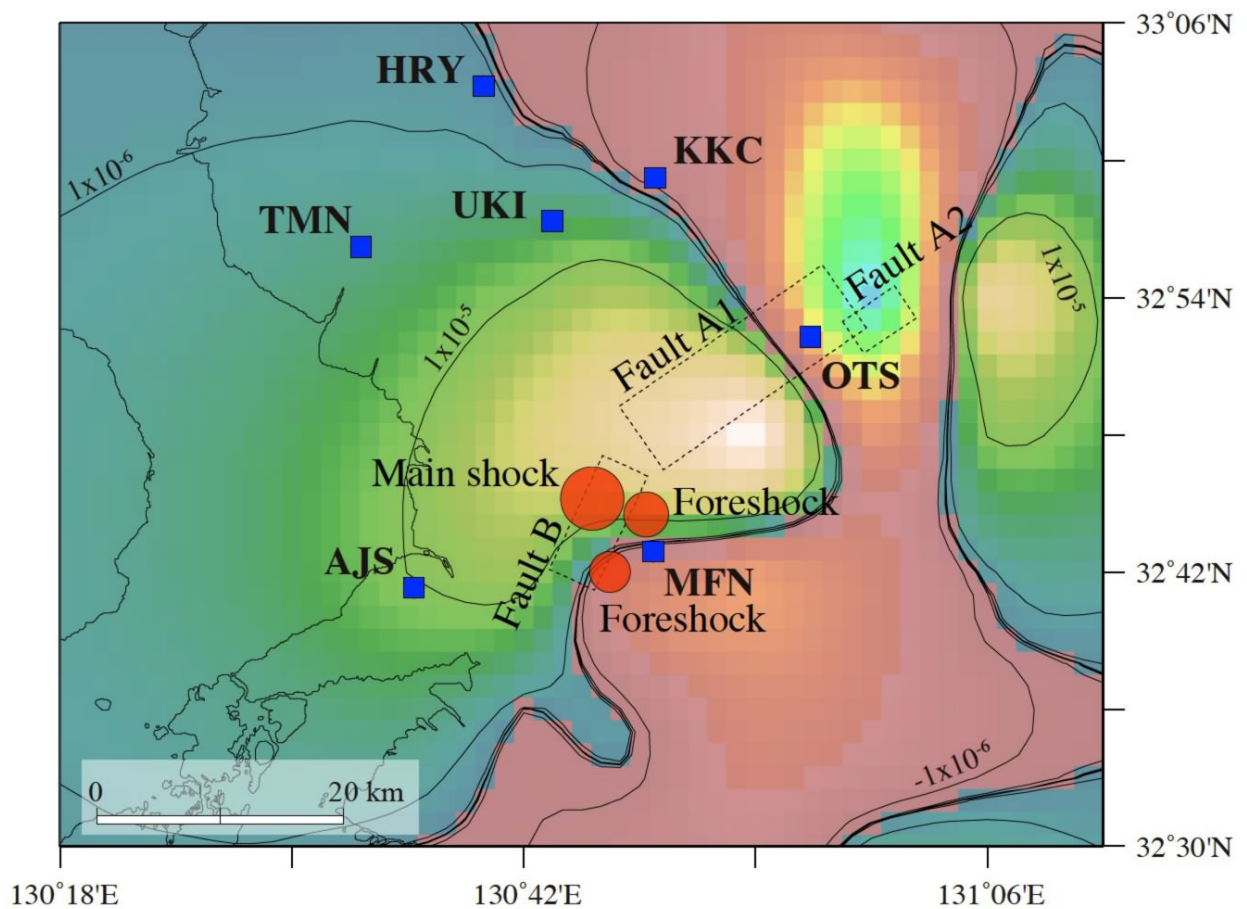

Supplementary Figure 3. Calculated volumetric strain changes in the Kumamoto region, Southwest Japan, which are estimated from three fault movements, A1, A2 and B (squares enclosed in dotted lines). Color contours show the strain changes; blue and red denote tensional and compressional changes, respectively. The blue squares denote the sampling sites. The base map was drawn by software package GMT32 (P. Wessel, W.H.F. Smith, New, improved version of the Generic Mapping Tools released. EOS Trans. AGU 79, 579, 1998).

Table 1. Sampling site, date, depth,  $^4\text{He}/^{20}\text{Ne}$  and  $^3\text{He}/^4\text{He}$  ratios of deep groundwater samples in Kumamoto region, SW Japan.

| Code | Sampling site | Sampling date | Location      |              | Depth<br>(m) | Distance<br>(km) | $^4\text{He}$ content<br>( $\text{cm}^3\text{STP/g}$ ) | $^4\text{He}/^{20}\text{Ne}$ | $^3\text{He}/^4\text{He}^*$<br>(Ra) | corrected $^3\text{He}/^4\text{He}^*$<br>(Ra) |
|------|---------------|---------------|---------------|--------------|--------------|------------------|--------------------------------------------------------|------------------------------|-------------------------------------|-----------------------------------------------|
|      |               |               | Longitude (N) | Latitude (E) |              |                  |                                                        |                              |                                     |                                               |
| AJS  | Ajisai        | 2016.4.28     | 32°41'17"     | 130°36'17"   | 900          | -5.0             | 1.37E-07                                               | 0.474                        | 1.260 ± 0.060                       | 1.604 ± 0.111                                 |
| MFN  | Mifune        | 2016.4.29     | 32°42'52"     | 130°48'41"   | 500          | -2.7             | 8.36E-06                                               | 22.1                         | 1.780 ± 0.040                       | 1.790 ± 0.040                                 |
| OTS  | Otsu          | 2016.4.28     | 32°52'16"     | 130°56'48"   | 1000         | 2.2              | 1.60E-05                                               | 13.5                         | 4.120 ± 0.100                       | 4.184 ± 0.102                                 |
| KKC  | Kikuchi       | 2016.4.28     | 32°59'12"     | 130°48'47"   | 300          | 23.0             | 1.10E-05                                               | 10.7                         | 1.210 ± 0.020                       | 1.215 ± 0.020                                 |
| UKI  | Ueki          | 2016.4.28     | 32°57'20"     | 130°43'28"   | 280          | 25.1             | 1.08E-05                                               | 24.5                         | 1.620 ± 0.040                       | 1.627 ± 0.040                                 |
| TMN  | Tamana        | 2016.4.28     | 32°56'13"     | 130°33'31"   | 400          | 30.8             | 1.88E-06                                               | 2.85                         | 0.623 ± 0.020                       | 0.584 ± 0.019                                 |
| HRY  | Hirayama      | 2016.4.28     | 33°03'12"     | 130°39'54"   | 1300         | 40.0             | 1.53E-05                                               | 27.6                         | 0.630 ± 0.020                       | 0.626 ± 0.020                                 |

\*: Error is two sigma.

Distance is calculated from the Futagawa-Hinagu fault.

STable 2. Helium contents and isotopic ratios of rock samples possibly composed in aquifer system in the Kumamoto region.

| No.                 | Code  | Sampling site | Rock name        | Longitude (N) | Latitude (E) | He content<br>(cm <sup>3</sup> STP/g) | <sup>3</sup> He/ <sup>4</sup> He<br>(Ra) |
|---------------------|-------|---------------|------------------|---------------|--------------|---------------------------------------|------------------------------------------|
| 1                   | MNT-1 | Mt. Manotani  | Pelitic schist   | 32°41'07.2"   | 130°53'40.8" | 1.2E-06                               | 0.07 ± 0.13                              |
| 2                   | MNT-2 | Mt. Manotani  | Mafic schist     | 32°41'07.2"   | 130°53'40.8" | 6.9E-07                               | <0.01                                    |
| 3                   | HGO-1 | Kosa          | Biotite gneiss   | 32°38'34.3"   | 130°49'50.9" | 2.8E-06                               | 0.25 ± 0.05                              |
| 4                   | KNH-1 | Konoha        | Pelitic schist   | 32°55'29.8"   | 130°39'46.6" | 1.6E-06                               | 0.16 ± 0.08                              |
| 5                   | SJN-1 | Shimojin      | Psammitic schist | 32°47'43.5"   | 130°51'23.6" | 2.8E-06                               | 0.06 ± 0.05                              |
| 6                   | SJN-2 | Shimojin      | Mafic schist     | 32°47'43.5"   | 130°51'23.6" | 2.4E-06                               | 0.56 ± 0.16                              |
| Error weighted mean |       |               |                  |               |              | 1.9E-06                               | 0.09 ± 0.02                              |

Error is two sigma.

STable 3. Corrected  $^3\text{He}/^4\text{He}$  ratios of before and after the M7.3 earthquake, original helium abundance, additional helium and rock degassing helium together with strain change.

| Code | Sampling site | Corrected $^3\text{He}/^4\text{He}$ (Ra) |           | Original He*<br>( $\text{cm}^3\text{STP/g}$ ) | Additional He<br>( $\text{cm}^3\text{STP/g}$ ) | Rock degassing He<br>( $\text{cm}^3\text{STP/g}$ ) | Strain change ( $\Delta V/V$ ) |           |           |          |
|------|---------------|------------------------------------------|-----------|-----------------------------------------------|------------------------------------------------|----------------------------------------------------|--------------------------------|-----------|-----------|----------|
|      |               | Before Eq.*                              | After Eq. |                                               |                                                |                                                    | A1                             | A2        | B         | total    |
| AJS  | Ajisai#       | 1.424                                    | 1.604     | 2.32E-07                                      | -                                              | -                                                  | 2.87E-06                       | 1.16E-08  | 6.82E-06  | 9.70E-06 |
| MFN  | Mifune        | 1.959                                    | 1.790     | 2.66E-05                                      | 2.64E-06 $\pm$ 1.03E-06                        | 1.05E-07 $\pm$ 4.12E-08                            | -1.56E-05                      | -7.79E-07 | -6.84E-07 | 1.71E-05 |
| OTS  | Otsu          | 4.823                                    | 4.184     | 2.22E-05                                      | 3.46E-06 $\pm$ 6.73E-07                        | 1.37E-07 $\pm$ 2.76E-08                            | -4.01E-05                      | 1.02E-05  | 2.22E-06  | 5.25E-05 |
| KKC  | Kikuchi       | 1.366                                    | 1.215     | 1.37E-05                                      | 1.83E-06 $\pm$ 5.18E-07                        | 7.25E-08 $\pm$ 2.09E-08                            | -2.04E-06                      | 1.70E-06  | -1.95E-06 | 5.69E-06 |
| UKI  | Ueki          | 1.775                                    | 1.627     | 1.68E-05                                      | 1.61E-06 $\pm$ 7.04E-07                        | 6.40E-08 $\pm$ 2.81E-08                            | 6.61E-06                       | 1.09E-06  | -3.72E-06 | 1.14E-05 |
| TMN  | Tamana        | 0.747                                    | 0.584     | 2.49E-06                                      | 8.16E-07 $\pm$ 1.74E-07                        | 3.24E-08 $\pm$ 7.10E-09                            | 4.40E-06                       | 3.27E-07  | -1.73E-06 | 6.46E-06 |
| HRY  | Hirayama      | 0.645                                    | 0.626     | 2.80E-05                                      | 9.67E-07 $\pm$ 1.43E-06                        | 3.84E-08 $\pm$ 5.69E-08                            | 4.46E-07                       | 3.87E-07  | -1.47E-06 | 2.30E-06 |

\*: Data are referred from Horiguchi and Matsuda (18).

#: Correction of helium isotopes is large due to low  $^4\text{He}/^{20}\text{Ne}$  ratio. Data are not used in following discussion.

Error is two sigma.
